# Supplementary material for: Blood Pressure Prediction Using Ensemble Rules during Isometric Sustained Weight Test
Source: MDPI journal article supplement (doi:10.3390/jcdd9120440), 2022-12-07

# Supplemental Digital Content

## Supplemental Digital Content 1. Feature extraction from PPG and ECG signals

| Extraction aspect     | Feature notation | Description                                 | Number |
|-----------------------|------------------|---------------------------------------------|--------|
| Waveform,x<br>Timings | dO               | Time from 2 consecutive foot wave           | 1      |
|                       | dP               | Time from 2 consecutive peak wave           | 2      |
|                       | dT               | $t(\text{dia}) - t(\text{s})$               | 3      |
|                       | cT               | $t(\text{s})$                               | 4      |
|                       | props            | $t(\text{s})/T$                             | 5      |
|                       | tsys             | $t(\text{dic})$                             | 6      |
|                       | tdia             | $T - t(\text{dic})$                         | 7      |
|                       | tratio           | $t(\text{s})/t(\text{dic})$                 | 8      |
|                       | proptd           | $(t(\text{dia}) - t(\text{s}))/T$           | 9      |
|                       | tp1-dia          | $t(\text{dia}) - t(\text{p1})$              | 10     |
|                       | tp2-dia          | $t(\text{dia}) - t(\text{p2})$              | 11     |
|                       | IPR              | $60/T$                                      | 12     |
| Amplitudes            | Am25             | Time from onset to the 25% of Amplitud      | 13     |
|                       | Am50             | Time from onset to the 50% of Amplitud      | 14     |
|                       | Am75             | Time from onset to the 75% of Amplitud      | 15     |
|                       | Am               | Amplitud of Pulse wave                      | 16     |
|                       | AI               | $(x(\text{p2}) - x(\text{p1}))/x(\text{s})$ | 17     |
| Areas                 | RI               | $x(\text{dia})/x(\text{s})$                 | 18     |
|                       | Rlp1             | $x(\text{dia})/x(\text{p1})$                | 19     |
|                       | Rlp2             | $x(\text{dia})/x(\text{p2})$                | 20     |
|                       | ratio p2-p1      | $x(\text{p2})/x(\text{p1})$                 | 21     |
|                       | A1               | area from pulse foot to dicrotic notch      | 22     |
|                       | A2               | area from dicrotic notch to pulse end       | 23     |
|                       | IPA              | $A2/A1$                                     | 24     |

|                      |                          |                                                           |    |
|----------------------|--------------------------|-----------------------------------------------------------|----|
| First derivative(x') | ms                       | $x'(ms)/x(s)$                                             | 25 |
| Amplitudes           |                          |                                                           |    |
| PPG",x"              | b/a                      | $x''(b)/x''(a)$                                           | 26 |
|                      | c/a                      | $x''(c)/x''(a)$                                           | 27 |
|                      | d/a                      | $x''(d)/x''(a)$                                           | 28 |
|                      | e/a                      | $x''(e)/x''(a)$                                           | 29 |
|                      | AGI                      | $(x''(b) - x''(c) - x''(d) - x''(e))/x''(a)$              | 30 |
| Timings              | AGInt                    | $(x''(b) - x''(e))/x''(a)$                                | 31 |
|                      | AGImod                   | $(x''(b) - x''(c) - x''(d))/x''(a)$                       | 32 |
|                      | tbc                      | $t(c) - t(b)$                                             | 33 |
|                      | tbd                      | $t(d) - t(b)$                                             | 34 |
| Slopes               | slopebc                  | d/dt of straight line between b and c,<br>normalized by a | 35 |
|                      | slopebd                  | d/dt of straight line between b and d,<br>normalized by a | 36 |
| Combined             | Multiple                 | IPAD                                                      | 37 |
| ECG-PPG              | PAT                      | oPAT                                                      | 38 |
|                      |                          | pPAT                                                      | 39 |
|                      |                          | msPAT                                                     | 40 |
|                      |                          | dicPAT                                                    | 41 |
|                      | PWV                      | diaPAT                                                    | 42 |
|                      |                          | oPWV                                                      | 43 |
|                      |                          | pPWV                                                      | 44 |
|                      |                          | msPWV                                                     | 45 |
|                      | Relative PAT<br>(PAT/RR) | dicPWV                                                    | 46 |
|                      |                          | diaPWV                                                    | 47 |

|                      |    |             |    |
|----------------------|----|-------------|----|
|                      | RR | RoPAT       | 48 |
|                      |    | RpPAT       | 49 |
|                      |    | RmsPAT      | 50 |
|                      |    | RdicPAT     | 51 |
|                      |    | RdiaPAT     | 52 |
|                      |    | RR interval | 53 |
| Demographic features |    | Age         | 54 |
|                      |    | Sex         | 55 |
|                      |    | Height      | 56 |
|                      |    | Weigh       | 57 |
|                      |    | IMC         | 58 |

## Supplemental digital content 2

The criteria listed in the table below were used to identify fiducial points on PPG pulse waves.

| Signal       | Fiducial point | Criterion                                                                                                                                                        |
|--------------|----------------|------------------------------------------------------------------------------------------------------------------------------------------------------------------|
| PPG,x        | 0              | 0                                                                                                                                                                |
|              | 0              | 0                                                                                                                                                                |
|              | 0              | 0                                                                                                                                                                |
| PPG',x'      | 0              | 0                                                                                                                                                                |
| PPG'', x''   | 0              | 0                                                                                                                                                                |
|              | 0              | 0                                                                                                                                                                |
|              | 0              | The greatest maximum of x'' between b and e (or if no maxima then the first of (i) the first maximum on x' after e, and (ii) the first minimum of x''' after e). |
|              | 0              | 0                                                                                                                                                                |
|              | 0              | The second maximum of x'' after ms and before 0.6 T (unless the c wave is an inflection point, in which case take the first maximum).                            |
| PPG''', x''' | 0              | 0                                                                                                                                                                |
|              | 0              | 0                                                                                                                                                                |
|              | 0              | Identify a candidate p2 at the last local minimum of x''' before d                                                                                               |

(unless  $c = d$ , in which case take the first local minimum of  $x''$  after  $d$ ). If there is a local maximum of  $x$  between this candidate and  $d$  then use this instead.

---

Supplemental Digital Content 3 Ten globally most important terms resulting from the RuleFit model in order of their estimated importance

| State | DBP   |        |       |                                                    |
|-------|-------|--------|-------|----------------------------------------------------|
| Rest  | Imp.  | Coeff. | Sup.  | Rule                                               |
|       | 100   | -2.270 | 0.101 | 0.224<pPAT<0.246 & cT>0.091                        |
|       | 75.26 | -1.128 | 0.297 | pPAT >0.247 & AI < -0.451                          |
|       | 70.14 | -1.699 | 0.087 | Height > 1.575 & 0.222<pPAT <0.246 & 1.92<Am <3.68 |
|       | 66.24 | 0.007  |       | A2                                                 |
|       | 59.42 | 20.66  |       | tbd                                                |
|       | 55.28 | 2.69   |       | Rlp1                                               |
|       | 54.09 | -2.99  | 0.015 | Am25>0.370 & Am50<0.129                            |
|       | 51.33 | 0.742  | 0.339 | Da<-0.149                                          |
|       | 47.53 | -0.664 | 0.401 | BMI >19.30 & Am >2.64                              |
|       | 46.07 | 0.728  | 0.250 | AGI < -1.14 & RoPAT >0.349                         |
| WBT   | 100   | -2.25  | 0.57  | Weight>45.95 & dicPAT <0.522                       |
|       | 98.02 | -2.30  | 0.66  | 0.202<oPAT<0.317                                   |
|       | 89.89 | 2.08   | 0.64  | Age<16 & A1 >121,2 & RoPAT<0.43                    |
|       | 87.89 | 4.54   |       | Rlp2                                               |
|       | 85.67 | 2.06   | 0.30  | 5.899<msPWV<6.373 & AI >-0.538                     |
|       | 75.34 | 3.48   | 0.06  | Da < 0.124 & RpPAT<0.336                           |

|      |       |        |       |                                                |
|------|-------|--------|-------|------------------------------------------------|
|      | 73.73 | -1.64  | 0.48  | Age> 14.50 & Am25>0.354                        |
|      | 73.20 | -1.62  | 0.49  | Age>14.50 & RoPAT < 0.404                      |
|      | 72.52 | 2.10   | 0.17  | A1>144. 6 & da < -0.055                        |
|      | 67.62 | 1.94   | 0.18  | MsPWV >6.322 & slopebc > 0.018                 |
|      | SBP   |        |       |                                                |
| Rest | 100   | -2.056 | 0.331 | BMI<19.30 & Am75 <0.242                        |
|      | 87.82 | 1.705  | 0.540 | Weight >42.6 & oPWV >4.832                     |
|      | 83.54 | -1.788 | 0.286 | Age <14.5 & Am75 <0.225                        |
|      | 73.09 | -1.65  | 0.240 | PPWV<4.992 & AGI < -0.883                      |
|      | 67.83 | -1.31  | 0.464 | MsPWV <6.2                                     |
|      | 65.76 | 1.323  | 0.363 | MsPAT < 0.258 & tradio >0.301                  |
|      | 53.70 | -1.737 | 0.099 | DiaPWV <2.717 & RdicPAT <0.634                 |
|      | 53.21 | 1.135  | 0.289 | Age > 16 & oPAT <0.322                         |
|      | 49.87 | -1.901 | 0.069 | dP>0.772 & 0.0041 < slopebd < 0.0046           |
|      | 49.34 | 1.075  | 0.270 | 42.6<Weight <61 & Am >2.005                    |
| WBT  | 100   | 2.34   | 0.610 | Weight > 42.60 & props > 0.1047 & AGlint <1.53 |
|      | 91.21 | -2.41  | 0.248 | OPAT>0.220 & pPAT>0.292                        |
|      | 82.24 | -28.87 |       | Height                                         |
|      | 77.22 | 2.80   | 0.112 | PPAT<0.278 & tbc < 0.092                       |
|      | 74.22 | 1.707  | 0.456 | 0.226<pPAT<0.309 & diaPAT <0.551               |

|      |       |        |       |                                          |
|------|-------|--------|-------|------------------------------------------|
|      | 72.82 | -1.723 | 0.375 | oPAT >0.216 & pPAT >0.230                |
|      | 53.84 | -1.32  | 0.322 | Age>16 & ca <0.201                       |
|      | 51.48 | -1.28  | 0.361 | OPAT>0.215 & da>-0.181                   |
|      | 47.99 | -1.32  | 0.221 | AGE>16 & da >-0.111                      |
|      | 46.96 | -1.50  | 0.850 | Ca <0.334                                |
|      | MBP   |        |       |                                          |
| Rest | 100   | 0.021  | 0.049 | 0.301<oPAT<0.32                          |
|      | 86.03 | -0.008 | 0.623 | OPAT>0.208 & pPAT >0.222 & Am>1.763      |
|      | 85.41 | 0.020  | 0.040 | MsPAT<0.256 & pPWV >5.675                |
|      | 76.80 | 0.0153 | 0.057 | PPAT<0.235 & cT <0.091                   |
|      | 74.16 | -0.010 | 0.128 | MsPWV<6.37 & tbc >0.885 & AGlint > -1.21 |
|      | 73.19 | 0.008  | 0.777 | pPAT<0.341 & diaPAT<0.579                |
|      | 72.95 | 0.015  | 0.051 | Age >1.76 & ca > 0.197                   |
|      | 67.65 | -0.009 | 0.132 | 0.224<PPAT < 0.274 & cT>0.090            |
|      | 67.20 | -0.018 | 0.028 | Am25>0.451 & AGImod < -1.15              |
|      | 66.10 | 0.0005 |       | A2                                       |
| WBT  | 100   | -2.56  | 0.29  | OPAT>0.220 & RoPAT<0.424                 |
|      | 97.27 | 3.95   | 0.09  | PPAT<0.235 & slopebc >0.011              |
|      | 66.78 | -2.17  | 0.15  | MsPWV <5.85 & RoPAT<0.448                |
|      | 62.20 | -0.484 |       | Age                                      |

|  |       |        |       |                                |
|--|-------|--------|-------|--------------------------------|
|  | 45.56 | -1.19  | 0.739 | Tradio >0.265 & da>-0.186      |
|  | 43.17 | 1.319  | 0.177 | DiaPAT < 0.548 & pPWV >5.324   |
|  | 43.06 | -1.131 | 0.177 | CT<0.075                       |
|  | 42.88 | 1.061  | 0.667 | pPWV<7.007 & da >-0.168        |
|  | 41.61 | 1.633  | 0.097 | Tradio <0.273 & slopebc >0.018 |
|  | 39.38 | -2.335 | 0.040 | Tradio <0.2737 slopebc <0.017  |

Supplemental Digital Content 4. Effect of the Dynamic weight-bearing test on the hemodynamic parameters, \* Statistically significant difference at  $p < 0.05$ .

|         | Rest  |       | WBT  |      |        |
|---------|-------|-------|------|------|--------|
| Feature | X     | SD    | X    | SD   | p      |
| oPAT    | 0.25  | 0.06  | 0.23 | 0.04 | 0.09   |
| pPAT    | 0.28  | 0.04  | 0.29 | 0.03 | 1      |
| msPAT   | 0.26  | 0.02  | 0.25 | 0.01 | 0.09   |
| dicPAT  | 0.5   | 0.02  | 0.5  | 0.02 | 0.22   |
| diaPAT  | 0.55  | 0.02  | 0.54 | 0.02 | 0.03 * |
| oPWV    | 6.42  | 1.23  | 6.88 | 0.95 | 0.09   |
| pPWV    | 5.6   | 0.79  | 5.37 | 0.75 | 1      |
| msPWV   | 6.09  | 0.33  | 6.2  | 0.32 | 0.16   |
| dicPWV  | 3.09  | 0.09  | 3.14 | 0.13 | 0.22   |
| diaPWV  | 2.83  | 0.09  | 2.88 | 0.07 | 0.03 * |
| dO      | 0.72  | 0.06  | 0.69 | 0.06 | 0.03 * |
| dP      | 0.72  | 0.06  | 0.69 | 0.06 | 0.03 * |
| dT      | 0.24  | 0.03  | 0.23 | 0.02 | 0.56   |
| cT      | 94.29 | 11.46 | 0.09 | 0.01 | 0.03 * |
| tsys    | 0.28  | 0.01  | 0.28 | 0.01 | 0.31   |
| props   | 0.13  | 0.02  | 0.14 | 0.02 | 0.44   |
| tdia    | 0.43  | 0.05  | 0.41 | 0.05 | 0.06   |



|         |        |      |        |       |        |
|---------|--------|------|--------|-------|--------|
| tradio  | 0.34   | 0.05 | 0.34   | 0.04  | 0.84   |
| propdT  | 0.33   | 0.03 | 0.34   | 0.04  | 0.56   |
| tp1     | 0.22   | 0.02 | 0.22   | 0.01  | 0.56   |
| tp2     | 0.13   | 0.01 | 0.13   | 0.01  | 1      |
| IPR     | 0.08   | 0.01 | 0.09   | 0.01  | 0.06   |
| Am100   | 2.79   | 0.22 | 2.9    | 0.19  | 0.09   |
| Am25    | 0.43   | 0.08 | 0.42   | 0.06  | 0.56   |
| Am50    | 0.29   | 0.09 | 0.28   | 0.09  | 0.44   |
| Am75    | 0.15   | 0.05 | 0.15   | 0.05  | 0.69   |
| AI      | -0.37  | 0.16 | -0.37  | 0.13  | 0.69   |
| RI      | 0.19   | 0.09 | 0.16   | 0.11  | 0.22   |
| RIp2    | 0.3    | 0.09 | 0.24   | 0.15  | 0.22   |
| RIp1    | 0.2    | 0.1  | 0.16   | 0.11  | 0.22   |
| ratio   | 0.6    | 0.19 | 0.6    | 0.16  | 0.84   |
| A1      | 0.24   | 0.03 | 0.24   | 0.03  | 0.44   |
| A2      | 0.24   | 0.03 | 0.23   | 0.02  | 1      |
| IPA     | 1.03   | 0.03 | 1.1    | 0.14  | 0.44   |
| tbc     | 0.09   | 0.01 | 0.09   | 0     | 0.31   |
| tbd     | 0.15   | 0.01 | 0.14   | 0.02  | 0.06   |
| slopebc | 0.01   | 0    | 0.01   | 0     | 0.69   |
| slopebd | 0.01   | 0    | 0.01   | 0     | 0.31   |
| ba      | -1.07  | 0.12 | -1.07  | 0.15  | 1      |
| ca      | 0.13   | 0.08 | 0.13   | 0.11  | 0.84   |
| da      | -0.12  | 0.05 | -0.13  | 0.04  | 0.56   |
| ea      | 0.19   | 0.06 | 0.19   | 0.06  | 0.69   |
| AGI     | -1.28  | 0.22 | -1.26  | 0.26  | 0.69   |
| AGlint  | -1.26  | 0.17 | -1.26  | 0.21  | 1      |
| AGImod  | -1.09  | 0.18 | -1.07  | 0.21  | 0.56   |
| ms      | 0      | 0    | 0      | 0     | 0.69   |
| IPAD    | -1.13  | 0.05 | -1.13  | 0.06  | 0.84   |
| DBP     | 76.47  | 3.23 | 82.69  | 4.58  | 0.06   |
| SBP     | 126.79 | 9.74 | 138.02 | 14.33 | 0.03 * |

|         |       |      |        |      |        |
|---------|-------|------|--------|------|--------|
| MBP     | 93.25 | 27.1 | 101.13 | 5.41 | 0.03 * |
| RR      | 0.72  | 0.06 | 0.69   | 0.06 | 0.03 * |
| RoPAT   | 0.36  | 0.07 | 0.34   | 0.05 | 0.56   |
| RpPAT   | 0.4   | 0.07 | 0.43   | 0.07 | 0.03 * |
| RmsPAT  | 0.36  | 0.03 | 0.37   | 0.03 | 0.22   |
| RdicPAT | 0.71  | 0.04 | 0.73   | 0.04 | 0.16   |
| RdiaPAT | 0.78  | 0.05 | 0.79   | 0.06 | 0.09   |
| HR      | 84.84 | 7.18 | 88.26  | 6.77 | 0.06   |

Supplemental digital content 5. DBP importance predictors during rest. (a) All values; (b) one subject values; (c) Lowest 10% values; (d) Highest 10% values

(a)

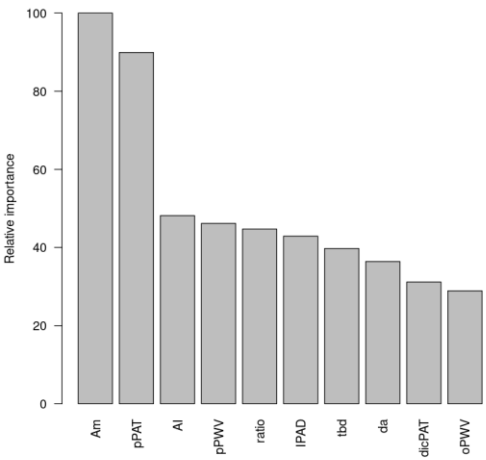

(b)

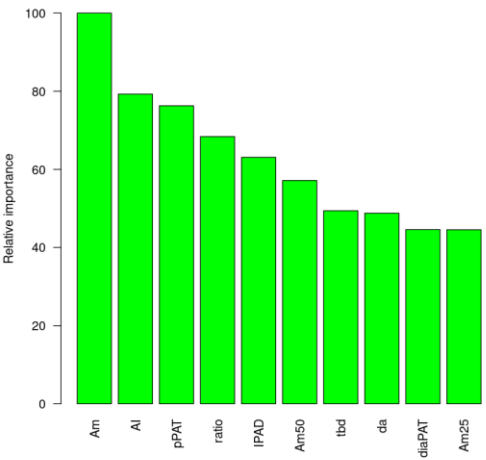

(c)

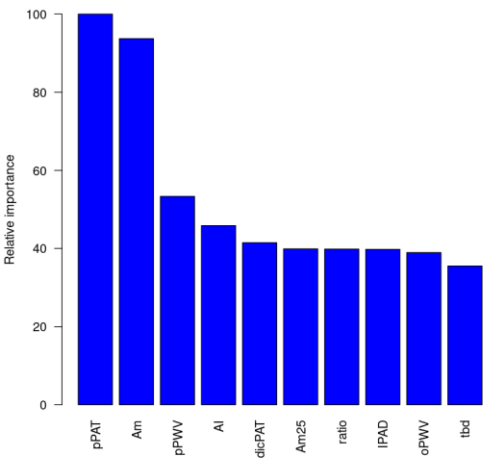

(d)

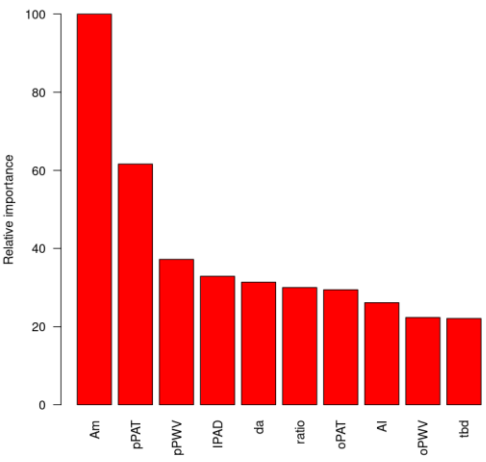

Supplemental digital content 6. SBP importance predictors during rest. (a) All values; (b) one subject values; (c) Lowest 10% values; (d) Highest 10% values

(a)

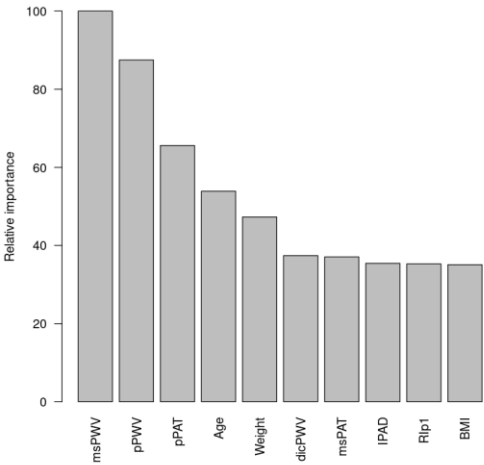

(b)

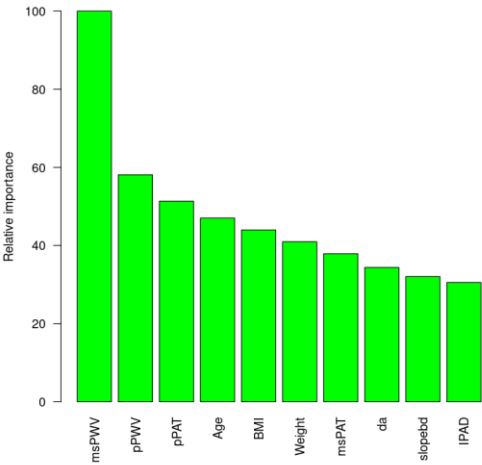

(c)

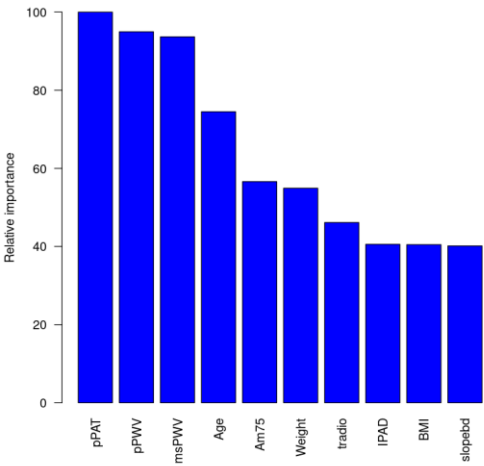

(d)

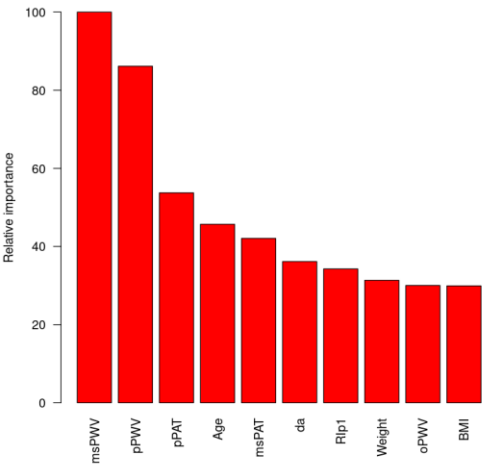

Supplemental digital content 7. MBP importance predictors during rest. (a) All values; (b) one subject values; (c) Lowest 10% values; (d) Highest 10% values

(a)

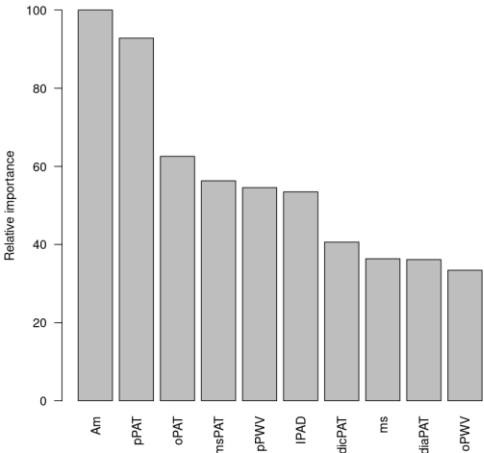

(b)

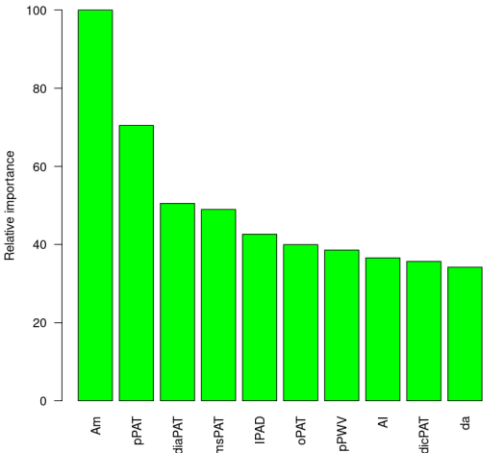

(c)

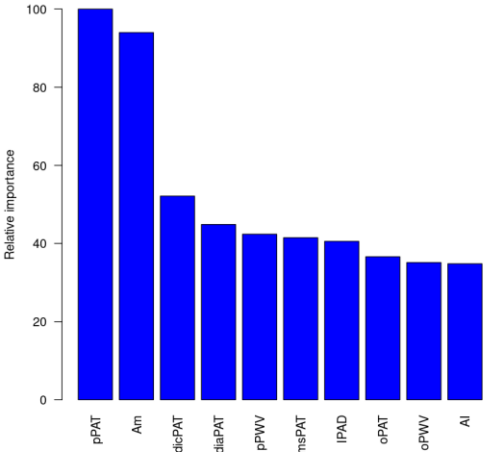

(d)

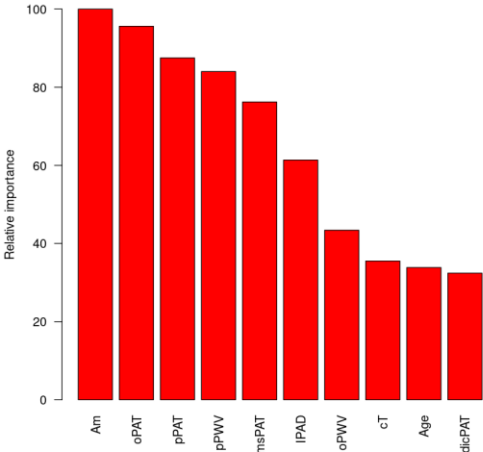

Supplemental digital content 8. DBP importance predictors during WBT. (a) All values; (b) one subject values; (c) Lowest 10% values; (d) Highest 10% values

(a)

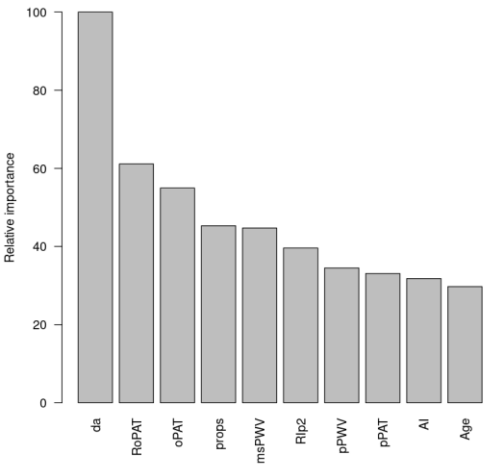

(b)

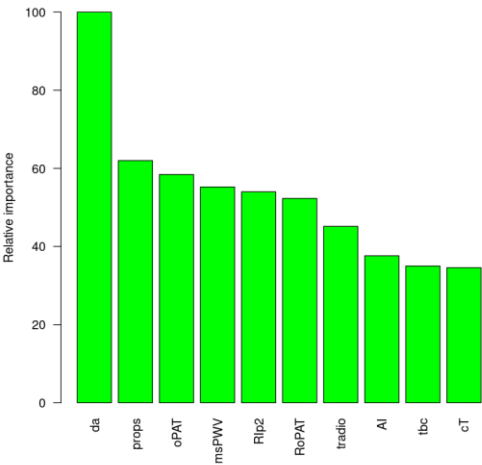

(c)

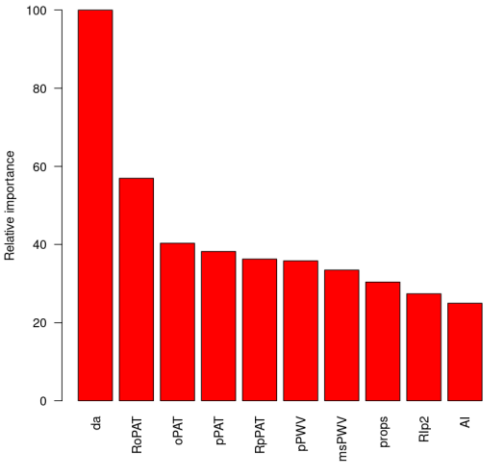

(d)

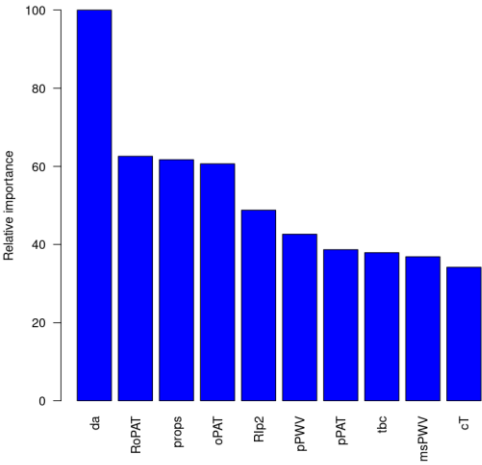

Supplemental digital content 9. SBP importance predictors during WBT. (a) All values; (b) one subject values; (c) Lowest 10% values; (d) Highest 10% values

(a)

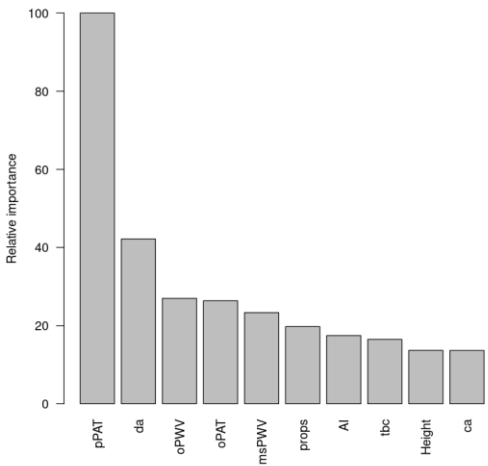

(b)

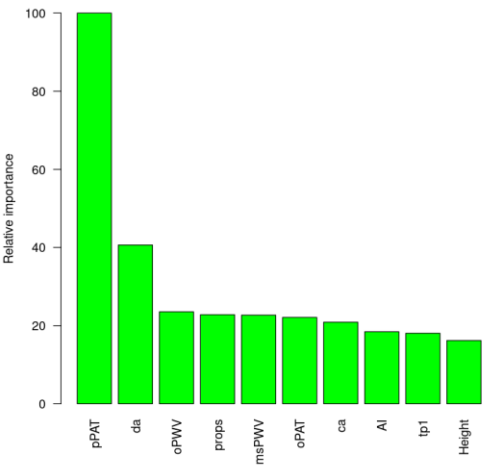

(c)

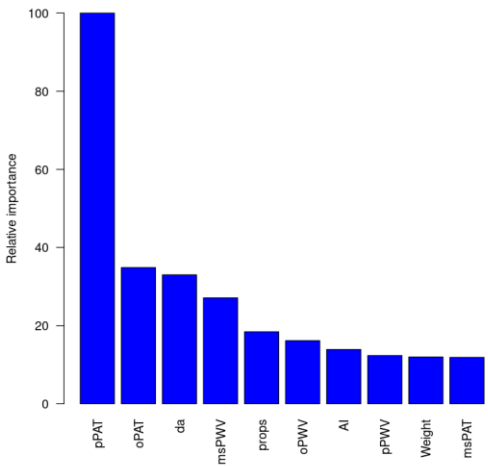

(d)

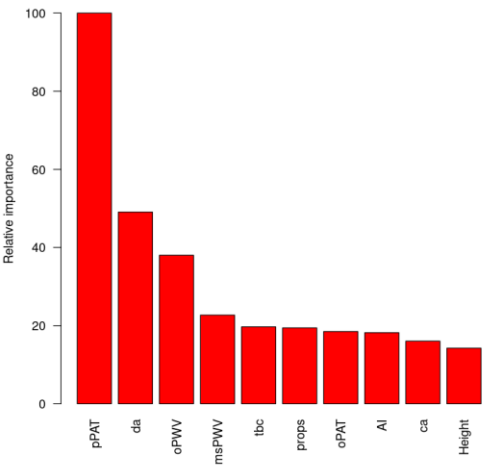

Supplemental digital content 10. MBP importance predictors during WBT. (a) All values; (b) one subject values; (c) Lowest 10% values; (d) Highest 10% values

(a)

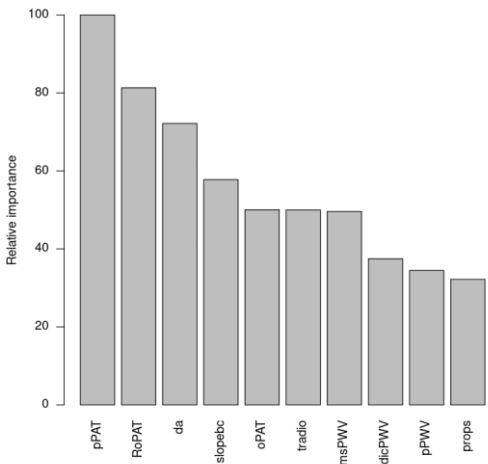

(b)

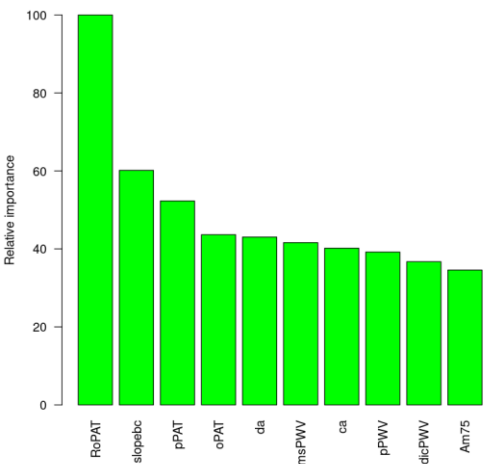

(c)

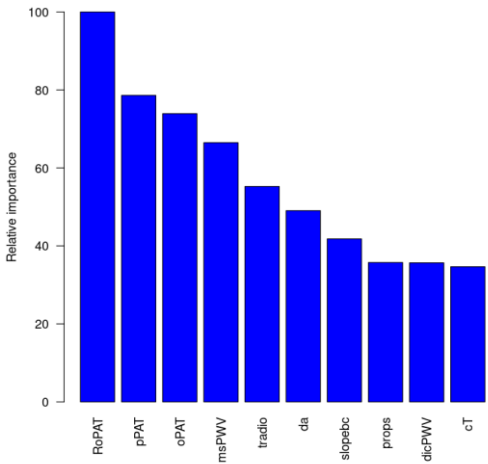

(d)

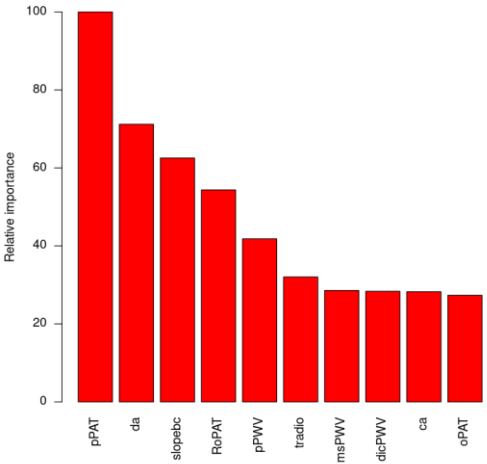



Supplemental digital content 11 Interaction among features for MBP (a) in rest state; (b) during WBT

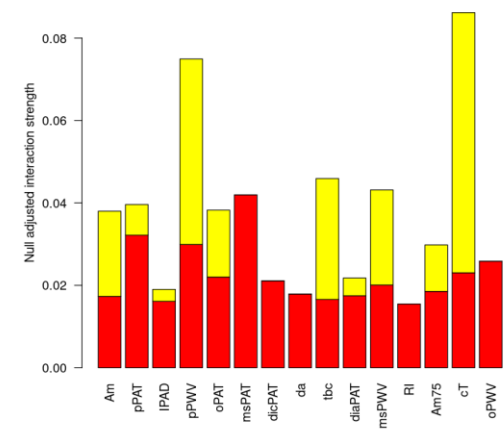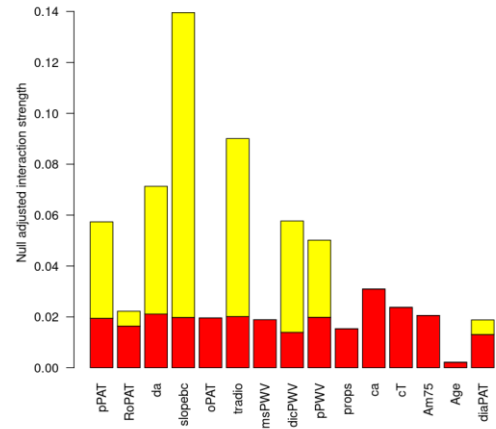

Supplement: s1 [file s1]
